# Supplementary material for: Genome-wide SNP profiling of worldwide goat populations reveals strong partitioning of diversity and highlights post-domestication migration routes
Source: PubMed Central journal article supplement (PMC6240949; doi:10.1186/s12711-018-0422-x), 2018-11-19

**a)**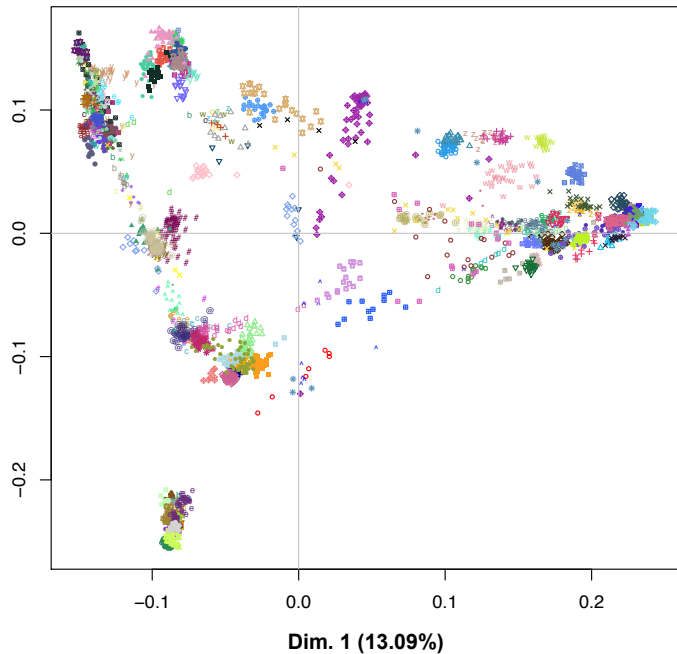**b)**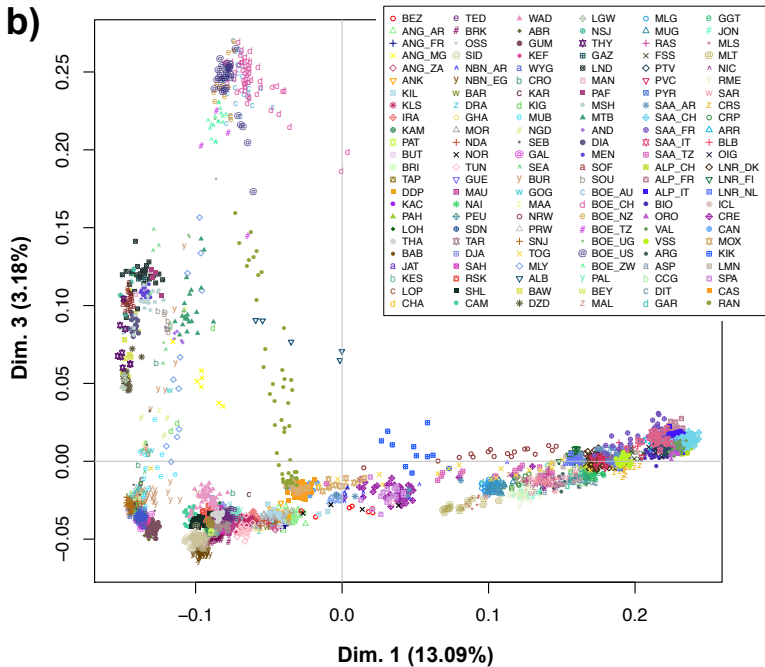

Supplement: 12711_2018_422_MOESM11_ESM.pdf [file 12711_2018_422_MOESM11_ESM.pdf]
